# Supplementary material for: Valley polarization of exciton–polaritons in monolayer WSe2 in a tunable microcavity
Source: Royal Society of Chemistry journal article supplement (doi:10.1039/c9nr02038a), 2019-01-01
Supplement: c9nr02038a1.pdf [file c9nr02038a1.pdf]

# Supplementary information for Valley polarization of exciton-polaritons in monolayer WSe<sub>2</sub> in a tunable microcavity

Mateusz Król,<sup>\*a</sup> Katarzyna Lekenta,<sup>a</sup> Rafał Mirek,<sup>a</sup> Karolina Łempicka,<sup>a</sup> Daniel Stephan,<sup>a</sup> Karol Nogajewski,<sup>a,b</sup> Maciej R. Molas,<sup>a,b</sup> Adam Babiński,<sup>a</sup> Marek Potemski,<sup>a,b</sup> Jacek Szczykko<sup>a</sup> and Barbara Piętka<sup>\*a</sup>

<sup>a</sup> Institute of Experimental Physics, Faculty of Physics, University of Warsaw, ul. Pasteura 5, PL-02-093 Warsaw, Poland.

<sup>b</sup> Laboratoire National des Champs Magnétiques Intenses, CNRS-UGA-UPS-INS-EMFL, Grenoble, France

\* Mateusz.Krol@fuw.edu.pl

† Barbara.Pietka@fuw.edu.pl

## Operation of the empty cavity at cryogenic temperature

The operation of the empty cavity (no WSe<sub>2</sub> monolayer inside) at 5 K is presented in Fig. S1. In the reflectance spectra shown in Fig. S1a, the cavity mode is visible as a narrow dip in the photonic stop-band around 1.754 eV. As can be seen, with the external voltage applied to the chip, the position of the cavity mode shifts towards higher energies. Importantly, the tuning of the cavity has no significant impact on the cavity's quality factor, which at normal incidence is close to 160. In the angle-resolved experiment, realized by means of Fourier-plane imaging of a high-numerical-aperture ( $NA = 0.55$ ) microscope objective, the reflectance spectra display a typical, parabolic-like energy vs observation angle dependence shown in Fig. S1b–g. A blueshift of the cavity mode with the voltage polarizing the piezoelectric chip is clearly visible.

We note that the piezoelectric chip is used only for fine adjustment of the cavity width during the experiments at low temperatures. The initial distance between the mirrors is set roughly before the cooling down process, during which the cavity width significantly decreases due to a thermal contraction of the holder. For that reason the cavity width and relationships between bias applied to the piezoactuator and the detuning varies between the succeeding experiments.

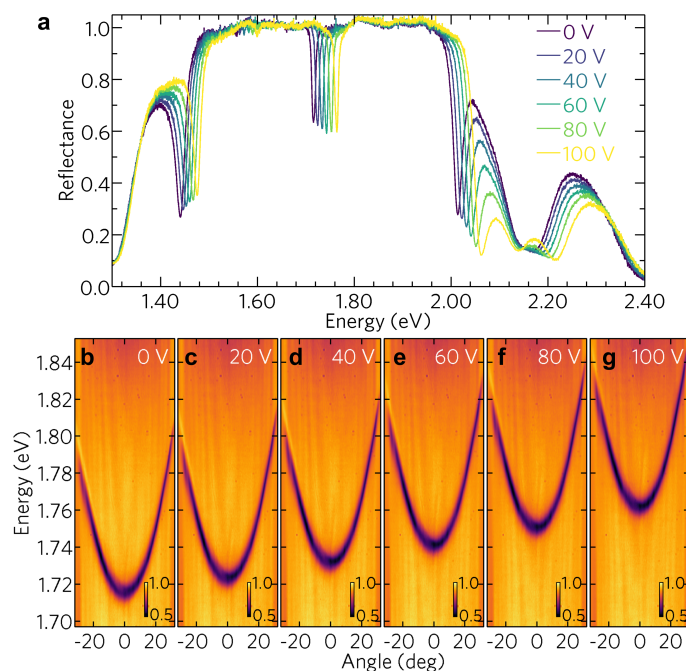

**Fig. S1** Reflectance from an empty cavity at 5 K. **a** Reflectance spectra at normal incidence for different voltages applied to the piezoelectric chip, **b–g** corresponding angle-resolved reflectance spectra for the cavity mode.
